# Supplementary material for: From starch to polylactide and nano-graphene oxide: fully starch derived high performance composites
Source: Royal Society of Chemistry journal article supplement (doi:10.1039/c6ra08194k), 2016-01-01
Supplement: c6ra08194k1.pdf [file c6ra08194k1.pdf]

*Supplementary Information for*

**From starch to polylactide and nano-graphene oxide: Fully starch derived high performance composites**

Duo Wu, Huan Xu, Minna Hakkarainen\*

Department of Fibre and Polymer Technology,

School of Chemical Science and Engineering,

Royal Institute of Technology (KTH),

SE-100 44, Stockholm, Sweden.

Email: [minna@kth.se](mailto:minna@kth.se)

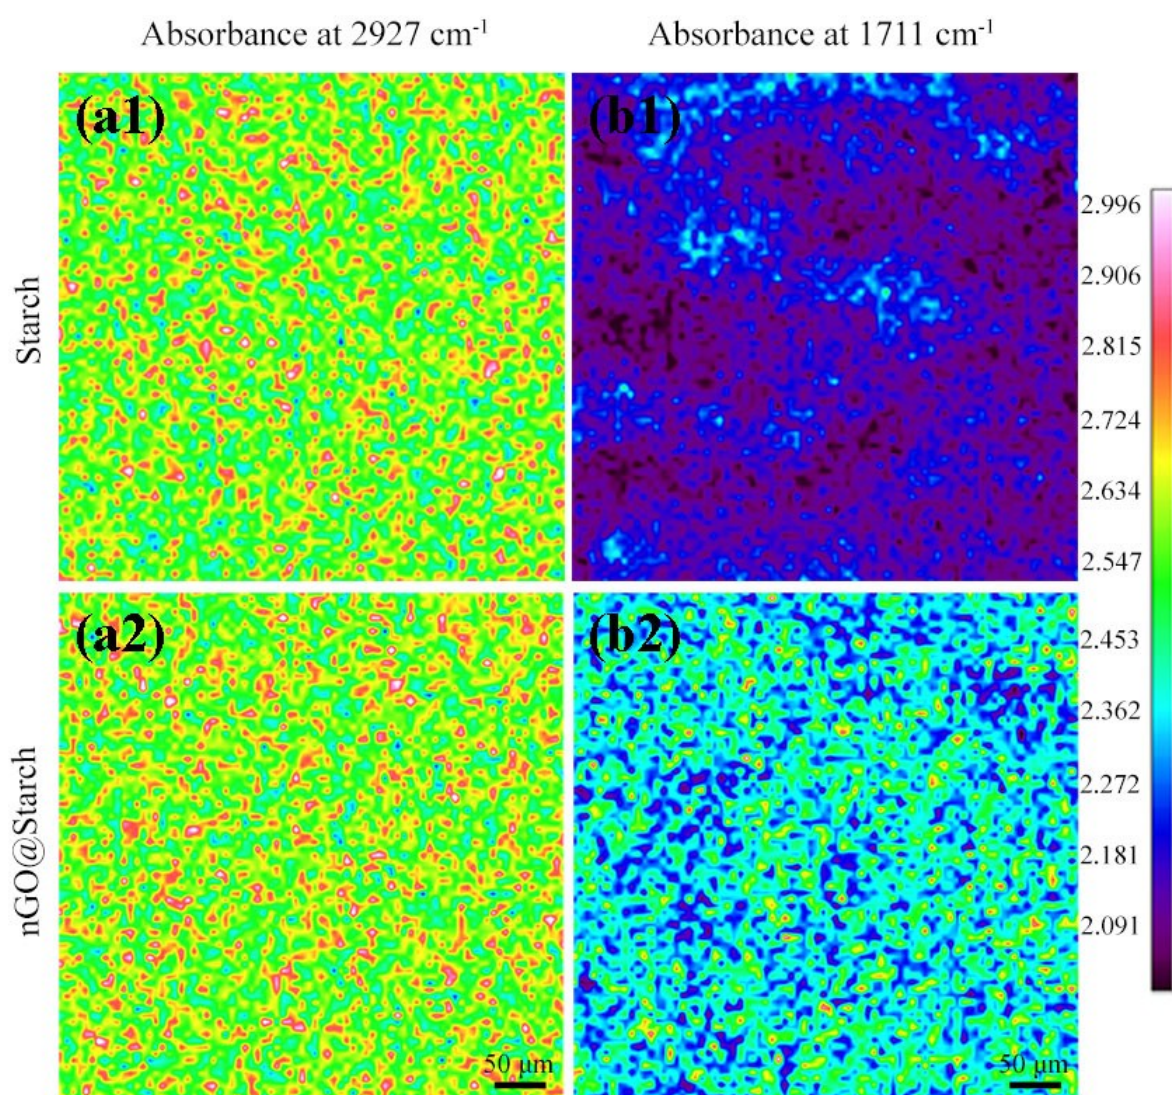

Figure S1 -CH2- absorbance image of starch at  $2927\text{ cm}^{-1}$  (a1 and a2) and carboxylic group absorbance image of nGO at  $1711\text{ cm}^{-1}$  (b1 and b2).

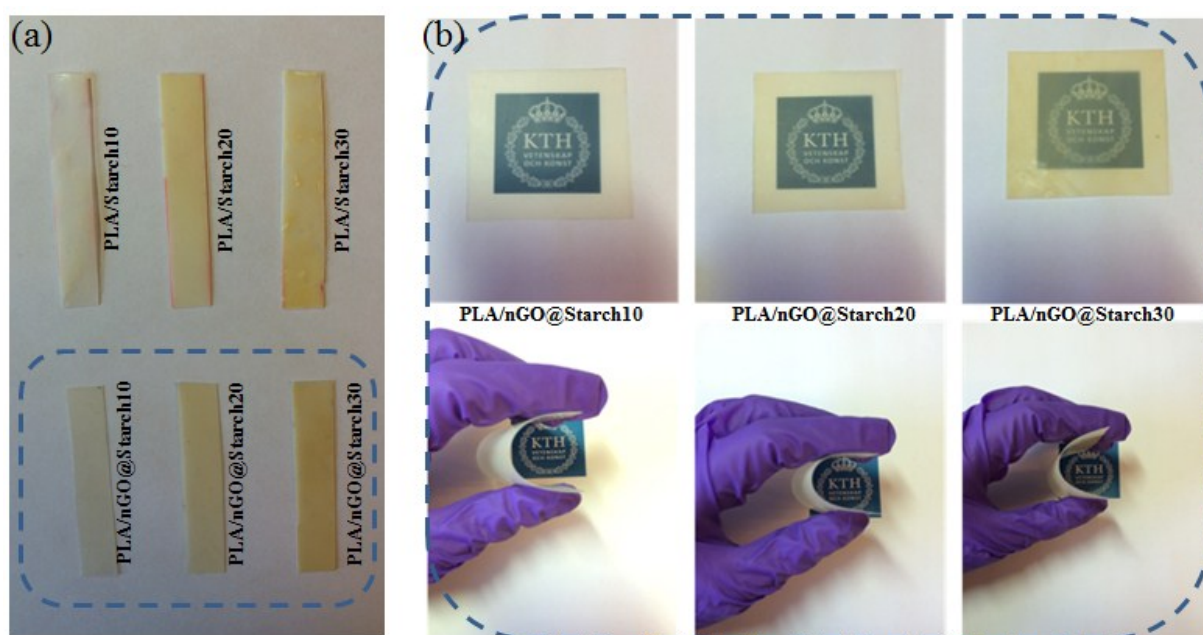

Figure S2 photos of PLA/Starch and PLA/nGO@Starch composites stripes (a); enlarged photos of PLA/nGO@Starch composites (b).

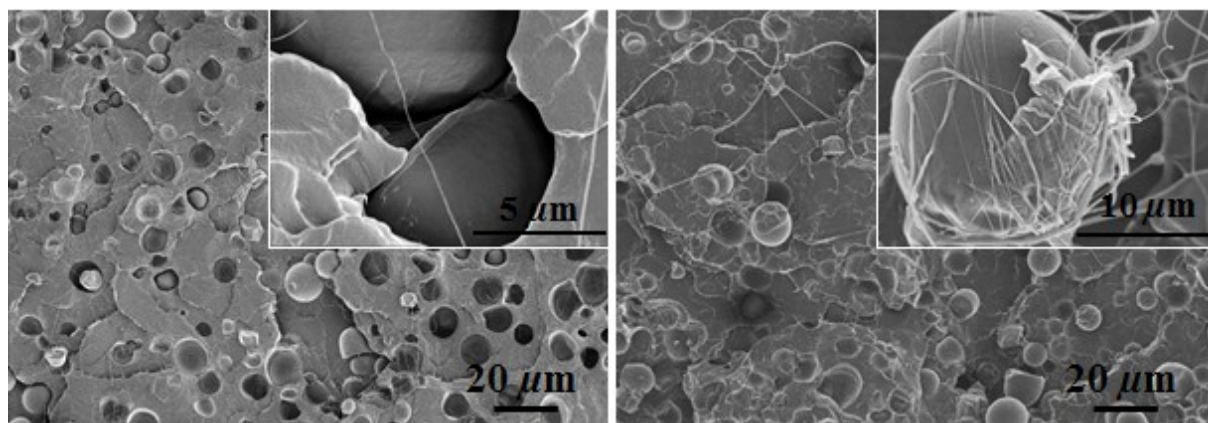

Figure S3 SEM images of the cross section of PLA/Starch10 (a) and PLA/GO@Starch10 (b) after tensile break.
